# Supplementary material for: Arbuscular Mycorrhizal Fungi Increase Pb Uptake of Colonized and Non-Colonized Medicago truncatula Root and Deliver Extra Pb to Colonized Root Segment
Source: MDPI journal article supplement (doi:10.3390/microorganisms9061203), 2021-06-02
Supplement: s1 [file s1]

### Supplementary Materials:

**Figure S1** Effects of Pb and *R. irregularis* inoculation on the expressions of *MtPT4* **(a)** and *MtBCP1* **(b)** in the root of *M. truncatula*. Expression of the *MtEF $\alpha$*  in the root of *M. truncatula* was used as an internal control for normalization. The data are the means  $\pm$  standard error (n = 3). Different letters within each gene indicate significant differences by LSD test ( $P < 0.05$ ), respectively. The abbreviation is consistent with Fig.2.

**Figure S2** Effects of Pb and *R. irregularis* inoculation on the concentration of P **(a)**, K **(b)**, Ca **(c)**, and Mg **(d)** in roots and shoots of *M. truncatula*. The data are the means  $\pm$  standard error (n = 3). Different letters within each gene indicate significant differences by LSD test ( $P < 0.05$ ), respectively. The abbreviation is consistent with Fig.2.

**Table S1** Primer list of RT-qPCR.

**Table S2** Correlation analysis between Pb and AM fungi colonization in root with biomass, root structure, nutritive element concentration, and the relative expressions of genes in *M. truncatula* plants in different treatments.
