# Supplementary material for: Arbuscular Mycorrhizal Fungi Increase Pb Uptake of Colonized and Non-Colonized Medicago truncatula Root and Deliver Extra Pb to Colonized Root Segment
Source: Microorganisms. 2021 Jun 2;9(6):1203. doi: 10.3390/microorganisms9061203 (PMC8229133; doi:10.3390/microorganisms9061203)
Supplement: Supplementary file 1 [file microorganisms-09-01203-s001.zip]

Archive with 4 entries (4 files):
- FigureS1.tif
- FigureS2.tif
- Supplementary caption.pdf
- Supplementary.xlsx
