# Supplementary material for: Arbuscular Mycorrhizal Fungi Increase Pb Uptake of Colonized and Non-Colonized Medicago truncatula Root and Deliver Extra Pb to Colonized Root Segment
Source: Microorganisms. 2021 Jun 2;9(6):1203. doi: 10.3390/microorganisms9061203 (PMC8229133; doi:10.3390/microorganisms9061203)
Supplement: Supplementary file 1 [file microorganisms-09-01203-s001.zip › Supplementary.xlsx]

## Sheet: Table S1
Supplementary Table S1 Primer list of RT-qPCR.
Gene name	Forward sequence 5’-3’	Reverse sequence 5’-3’	Tm	Reference
MtAQP1	TATGCTACAGCCGTTGACCC	TGAAGGCTCCACCAACCAAA	56.4	Krajinski et al. (2000)
MtPIP1	TCAGCCACCGATGCTAAACG	CCAAGAACACAGCGAACCCA	56.4	Watts-Williams et al. (2019)
MtPIP2	CCCGCTAGGAGTTTCGGAC	CAATAAATCCACTGATCATCCCAGG	55.5	Watts-Williams et al. (2019)
MtNIP1	CGGAGCATGGGTCTACAACA	AGGAAGGATGCACTCTGGGT	55.5	Watts-Williams et al. (2019)
MtNIP4	AGCAGGGCCAATAACAGGAG	TCTTCGGGAAGCTTGACTGC	55.5	Watts-Williams et al. (2019)
MtPT4	GACACGAGGCGCTTTCATAGCAGC	GTCATCGCAGCTGGAACAGCACCG	56.4	Zhang et al. (2010)
MtBCP1	AAGGTTGTCACCAACACGAA	TGCAATCTACCTTGCCATTT	56.4	Zhang et al. (2010)
MtEF1a	TGACAGGCGATCTGGTAAGG	TCAGCGAAGGTCTCAACCAC	55.5	Zhang et al. (2010)

## Sheet: Table S2
Supplementary Table S2 Correlation analysis between Pb and AM fungi colonization in root with biomass, root structure, nutritive element concentration and the relative expression of genes in M. truncatula plants in different treatments.
	Root Pb concentration	Root Pb content	Shoot Pb concentration	Shoot Pb content	Root Pb concentration/surface	Root Biomass	Shoot Biomass	Root surface	Root length	Root diameter	Total colonization	Arbuscular colonization	MtPT4	MtBCP1	MtAQP1	MtPIP1	MtPIP2	MtNIP1	MtNIP4	Pn	Ci	Tr	Gs	Root P concentration	Shoot P concentration
Root Pb concentration	1	.962**	.688**	.702**	.941**	-.563**	0.027	-.587**	-.549**	-.403*	0.092	0.197	.391*	0.275	0.169	0.31	.437*	-0.169	-0.274	-.366*	.389*	0.18	0.328	-0.022	-.385*
Root Pb content	.962**	1	.607**	.589**	.898**	-.369*	-0.021	-.491**	-.462*	-0.328	0.053	0.189	0.346	0.261	0.148	0.331	.416*	-0.139	-0.266	-.382*	.408*	0.161	.399*	-0.041	-.454*
Shoot Pb concentration	.688**	.607**	1	.696**	.710**	-.517**	-.368*	-.623**	-.636**	-0.337	0.261	0.276	0.281	0.08	.373*	0.022	.388*	-0.278	-0.196	-.400*	.475**	0.25	0.329	-0.169	-0.332
Shoot Pb content	.702**	.589**	.696**	1	.742**	-.677**	0.268	-.833**	-.812**	-.657**	.421*	.439*	.521**	.526**	0.217	0.029	.523**	0.041	-0.098	-0.314	0.064	-0.068	-0.018	0.102	-0.136
Root Pb concentration/surface	.941**	.898**	.710**	.742**	1	-.625**	0.098	-.749**	-.676**	-.589**	0.269	0.347	.552**	.391*	0.121	0.157	.434*	-0.023	-0.263	-0.358	0.263	0.047	0.241	0.105	-0.311
Root Biomass	-.563**	-.369*	-.517**	-.677**	-.625**	1	-0.23	.654**	.564**	.603**	-0.284	-0.223	-.523**	-.370*	-0.148	0.095	-0.192	-0.007	0.017	0.009	0.023	-0.149	-0.084	-0.285	0.012
Shoot Biomass	0.027	-0.021	-.368*	0.268	0.098	-0.23	1	-0.256	-0.154	-.464**	0.263	0.239	.482**	.603**	-0.226	-0.07	0.045	.464**	0.093	0.329	-.525**	-0.243	-0.214	.509**	0.082
Root surface	-.587**	-.491**	-.623**	-.833**	-.749**	.654**	-0.256	1	.956**	.772**	-.535**	-.532**	-.629**	-.515**	-0.115	0.119	-.472**	-0.168	0.204	.436*	0.037	0.308	0.103	-0.26	0.109
Root length	-.549**	-.462*	-.636**	-.812**	-.676**	.564**	-0.154	.956**	1	.594**	-.371*	-.374*	-.436*	-0.354	-0.072	0.088	-.510**	-0.034	0.286	.529**	-0.001	.365*	0.134	-0.15	0.128
Root diameter	-.403*	-0.328	-0.337	-.657**	-.589**	.603**	-.464**	.772**	.594**	1	-.722**	-.686**	-.837**	-.783**	-0.156	0.184	-0.169	-.433*	-0.183	0.12	0.306	0.111	0.16	-.381*	-0.168
Total colonization	0.092	0.053	0.261	.421*	0.269	-0.284	0.263	-.535**	-.371*	-.722**	1	.967**	.787**	.721**	0.157	-0.341	0.085	.653**	0.149	-0.011	-0.156	-0.036	-0.042	.371*	0.058
Arbuscular colonization	0.197	0.189	0.276	.439*	0.347	-0.223	0.239	-.532**	-.374*	-.686**	.967**	1	.782**	.704**	0.136	-0.253	0.22	.665**	0.063	-0.07	-0.052	-0.012	0.034	0.326	-0.048
MtPT4	.391*	0.346	0.281	.521**	.552**	-.523**	.482**	-.629**	-.436*	-.837**	.787**	.782**	1	.816**	0.141	-0.062	0.163	.541**	0.074	0.087	-0.257	-0.013	0.028	.582**	0.044
MtBCP1	0.275	0.261	0.08	.526**	.391*	-.370*	.603**	-.515**	-0.354	-.783**	.721**	.704**	.816**	1	0.007	-0.171	0.013	.580**	0.167	0.129	-.407*	-0.145	-0.112	.572**	0.118
MtAQP1	0.169	0.148	.373*	0.217	0.121	-0.148	-0.226	-0.115	-0.072	-0.156	0.157	0.136	0.141	0.007	1	0.304	-0.018	-0.308	0.208	-0.111	.376*	0.246	0.284	-0.104	-0.182
MtPIP1	0.31	0.331	0.022	0.029	0.157	0.095	-0.07	0.119	0.088	0.184	-0.341	-0.253	-0.062	-0.171	0.304	1	0.263	-0.208	-0.037	0.02	0.218	0.093	0.109	-0.143	-0.006
MtPIP2	.437*	.416*	.388*	.523**	.434*	-0.192	0.045	-.472**	-.510**	-0.169	0.085	0.22	0.163	0.013	-0.018	0.263	1	0.126	-.475**	-0.324	0.201	-0.169	0.045	-0.181	-0.267
MtNIP1	-0.169	-0.139	-0.278	0.041	-0.023	-0.007	.464**	-0.168	-0.034	-.433*	.653**	.665**	.541**	.580**	-0.308	-0.208	0.126	1	0.139	0.307	-.466**	-0.15	-0.174	0.319	0.27
MtNIP4	-0.274	-0.266	-0.196	-0.098	-0.263	0.017	0.093	0.204	0.286	-0.183	0.149	0.063	0.074	0.167	0.208	-0.037	-.475**	0.139	1	.369*	-0.252	0.285	-0.094	0.049	0.349
Pn	-.366*	-.382*	-.400*	-0.314	-0.358	0.009	0.329	.436*	.529**	0.12	-0.011	-0.07	0.087	0.129	-0.111	0.02	-0.324	0.307	.369*	1	-.432*	0.354	0.171	0.286	0.207
Ci	.389*	.408*	.475**	0.064	0.263	0.023	-.525**	0.037	-0.001	0.306	-0.156	-0.052	-0.257	-.407*	.376*	0.218	0.201	-.466**	-0.252	-.432*	1	.393*	.600**	-.363*	-.714**
Tr	0.18	0.161	0.25	-0.068	0.047	-0.149	-0.243	0.308	.365*	0.111	-0.036	-0.012	-0.013	-0.145	0.246	0.093	-0.169	-0.15	0.285	0.354	.393*	1	.679**	-0.09	-0.236
Gs	0.328	.399*	0.329	-0.018	0.241	-0.084	-0.214	0.103	0.134	0.16	-0.042	0.034	0.028	-0.112	0.284	0.109	0.045	-0.174	-0.094	0.171	.600**	.679**	1	0.074	-.764**
Root P concentration	-0.022	-0.041	-0.169	0.102	0.105	-0.285	.509**	-0.26	-0.15	-.381*	.371*	0.326	.582**	.572**	-0.104	-0.143	-0.181	0.319	0.049	0.286	-.363*	-0.09	0.074	1	0.062
Shoot P concentration	-.385*	-.454*	-0.332	-0.136	-0.311	0.012	0.082	0.109	0.128	-0.168	0.058	-0.048	0.044	0.118	-0.182	-0.006	-0.267	0.27	0.349	0.207	-.714**	-0.236	-.764**	0.062	1
